# Supplementary material for: Crystal, electronic and magnetic structures of a novel series of intergrowth carbometalates R4Co2C3 (R = Y, Gd, Tb)
Source: Royal Society of Chemistry journal article supplement (doi:10.1039/d1dt00420d), 2021-01-01
Supplement: d1dt00420d1.pdf [file d1dt00420d1.pdf]

## Supplementary materials

**Table S1** Atomic coordinates of Tb<sub>4</sub>Co<sub>2</sub>C<sub>3</sub> refined from NPD ( $\lambda = 1.28 \text{ \AA}$ ) at 100(1) K and PXRD at 293(2) K ( $\lambda = 1.54185 \text{ \AA}$ )

| Atom                                                      | Site | x          | y   | z          |
|-----------------------------------------------------------|------|------------|-----|------------|
| <b>100 K, <math>B_{ov} = 0.19(5) \text{ \AA}^2</math></b> |      |            |     |            |
| Tb1                                                       | 2n   | 0.2790(6)  | 1/2 | 0.9019(12) |
| Tb2                                                       | 2n   | 0.7106(6)  | 1/2 | 0.6134(12) |
| Tb3                                                       | 2n   | 0.0001(8)  | 1/2 | 0.7495(13) |
| Tb4                                                       | 2m   | 0.4916(5)  | 0   | 0.2569(12) |
| Co1                                                       | 2m   | 0.8437(13) | 0   | 0.423(4)   |
| Co2                                                       | 2m   | 0.8564(14) | 0   | 0.929(4)   |
| C1                                                        | 2n   | 0.1480(5)  | 1/2 | 0.5781(14) |
| C2                                                        | 2m   | 0.3010(4)  | 0   | 0.1459(13) |
| C3                                                        | 1h   | 1/2        | 1/2 | 1/2        |
| C4                                                        | 1a   | 0          | 0   | 0          |
| <b>293 K, <math>B_{ov} = 0.8(2) \text{ \AA}^2</math></b>  |      |            |     |            |
| Tb1                                                       | 2n   | 0.278(1)   | 1/2 | 0.901(2)   |
| Tb2                                                       | 2n   | 0.710(1)   | 1/2 | 0.613(2)   |
| Tb3                                                       | 2n   | 0.000(1)   | 1/2 | 0.750(2)   |
| Tb4                                                       | 2m   | 0.493(5)   | 0   | 0.258(2)   |
| Co1                                                       | 2m   | 0.843(2)   | 0   | 0.424(4)   |
| Co2                                                       | 2m   | 0.856(2)   | 0   | 0.927(4)   |
| C1                                                        | 2n   | 0.148(1)   | 1/2 | 0.577(2)   |
| C2                                                        | 2m   | 0.301(1)   | 0   | 0.147(2)   |
| C3                                                        | 1h   | 1/2        | 1/2 | 1/2        |
| C4                                                        | 1a   | 0          | 0   | 0          |

**Table S2** Interatomic distances (in  $\text{\AA}$ ) and coordination numbers (CN) for different atom sites in Tb<sub>4</sub>Co<sub>2</sub>C<sub>3</sub> (at 293 K)

| Atom       | Neighbor   | Distance  | CN |
|------------|------------|-----------|----|
| Tb1        | - C1       | 2.355(9)  | 15 |
|            | - C3 (x2)  | 2.492(6)  |    |
|            | - Tb1      | 3.40(1)   |    |
|            | - Tb2 (x2) | 3.488(9)  |    |
|            | - Tb1 (x2) | 3.6425(1) |    |
|            | - Tb3 (x2) | 3.66(1)   |    |
|            | - Tb2 (x2) | 3.70(1)   |    |
|            | - Tb1      | 3.71(1)   |    |
|            | - Tb3 (x2) | 3.876(9)  |    |
| Tb2        | - C1 (x2)  | 2.530(8)  | 17 |
|            | - C2       | 2.54(1)   |    |
|            | - C3       | 2.600(8)  |    |
|            | - Co1 (x2) | 3.05(2)   |    |
|            | - Co2 (x2) | 3.09(2)   |    |
|            | - Tb3      | 3.41(1)   |    |
|            | - Tb1 (x2) | 3.488(9)  |    |
|            | - Tb4      | 3.57(1)   |    |
|            | - Tb2 (x2) | 3.6425(1) |    |
|            | - Tb3      | 3.70(1)   |    |
| - Tb1 (x2) | 3.70(1)    |           |    |
| Tb3        | - C2       | 2.45(1)   | 16 |
|            | - C1 (x2)  | 2.477(8)  |    |
|            | - Co2 (x2) | 2.98(2)   |    |
|            | - Co1 (x2) | 3.03(2)   |    |

|             |            |           |    |
|-------------|------------|-----------|----|
| Tb3 (cont.) | - Tb2      | 3.41(1)   |    |
|             | - Tb4      | 3.44(1)   |    |
|             | - Tb3 (x2) | 3.6425(1) |    |
|             | - Tb1 (x2) | 3.66(1)   |    |
|             | - Tb2      | 3.70(1)   |    |
|             | - Tb1 (x2) | 3.876(9)  |    |
| Tb4         | - C2       | 2.51(1)   | 18 |
|             | - C4 (x2)  | 2.546(6)  |    |
|             | - C2       | 2.57(1)   |    |
|             | - Co2 (x2) | 3.10(2)   |    |
|             | - Co2 (x2) | 3.11(2)   |    |
|             | - Co1 (x2) | 3.19(2)   |    |
|             | - Co1 (x2) | 3.19(2)   |    |
|             | - Tb3      | 3.44(1)   |    |
|             | - Tb4      | 3.54(1)   |    |
|             | - Tb4      | 3.56(1)   |    |
| - Tb2       | 3.57(1)    |           |    |
| - Tb4 (x2)  | 3.6425(1)  |           |    |
| Co1         | - C2 (x2)  | 1.824(1)  | 10 |
|             | - Tb3 (x2) | 3.03(2)   |    |
|             | - Tb2 (x2) | 3.05(2)   |    |
|             | - Tb4 (x2) | 3.19(2)   |    |
|             | - Tb4 (x2) | 3.19(2)   |    |
| Co2         | - C4       | 1.77(2)   | 10 |
|             | - C1       | 1.94(2)   |    |
|             | - Tb3 (x2) | 2.98(2)   |    |
|             | - Tb2 (x2) | 3.09(2)   |    |
|             | - Tb4 (x2) | 3.10(2)   |    |
|             | - Tb4 (x2) | 3.11(2)   |    |
| C1          | - Co2      | 1.94(2)   | 6  |
|             | - Tb1      | 2.355(9)  |    |
|             | - Tb3 (x2) | 2.477(8)  |    |
|             | - Tb2 (x2) | 2.530(8)  |    |
| C2          | - Co1 (x2) | 1.824(1)  | 6  |
|             | - Tb3      | 2.45(1)   |    |
|             | - Tb4      | 2.51(1)   |    |
|             | - Tb2      | 2.54(1)   |    |
|             | - Tb4      | 2.57(1)   |    |
| C3          | - Tb1 (x4) | 2.492(6)  | 6  |
|             | - Tb2 (x2) | 2.600(8)  |    |
| C4          | - Co2 (x2) | 1.77(2)   | 6  |
|             | - Tb4 (x4) | 2.546(6)  |    |

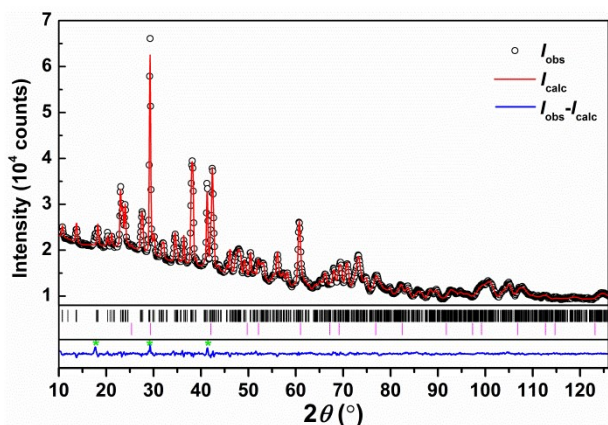

**Fig. S1** Full neutron powder diffraction pattern of  $\text{Tb}_4\text{Co}_2\text{C}_3$  collected at 100 K and  $\lambda = 1.28 \text{ \AA}$ . Black ticks indicate the positions of Bragg reflections for the  $\text{Tb}_4\text{Co}_2\text{C}_3$  phase, magenta ticks –  $\beta\text{-Tb}_2\text{C}$  [structure type (ST) NaCl] phase.

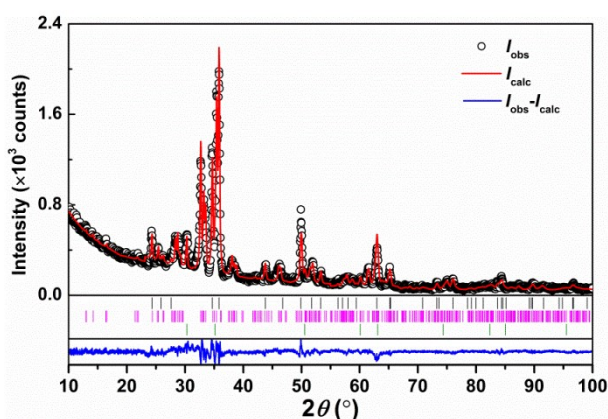

**Fig. S2** X-ray powder diffraction pattern for  $\text{Y}_4\text{Co}_2\text{C}_3$  measured at 293(2) K and  $\lambda = 1.54185 \text{ \AA}$ . Black ticks indicate the positions of Bragg reflections for the  $\text{YCoC}$  phase, magenta ticks –  $\text{Y}_4\text{Co}_2\text{C}_3$ , green ticks –  $\beta\text{-Y}_2\text{C}$  (ST NaCl) phase.

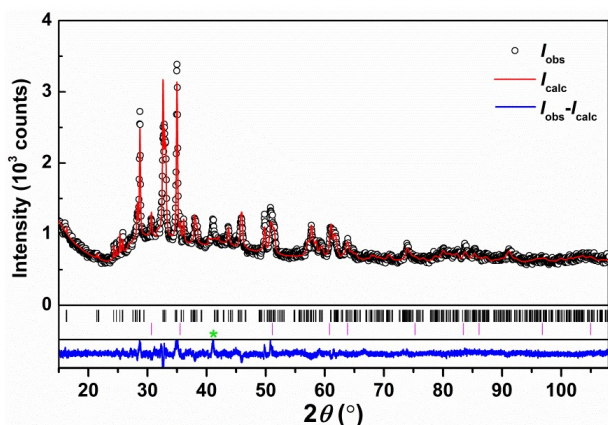

**Fig. S3** X-ray powder diffraction pattern for  $\text{Gd}_4\text{Co}_2\text{C}_3$  measured at 293(2) K and  $\lambda = 1.54185 \text{ \AA}$ . Black ticks indicate the positions of Bragg reflections for the  $\text{Gd}_4\text{Co}_2\text{C}_3$  phase, magenta ticks –  $\beta\text{-Gd}_2\text{C}$  (ST NaCl) impurity phase. The green asterisk points out an impurity peak corresponding to the (311) reflection of  $\text{GdCo}_2$  (ST  $\text{MgCu}_2$ ).

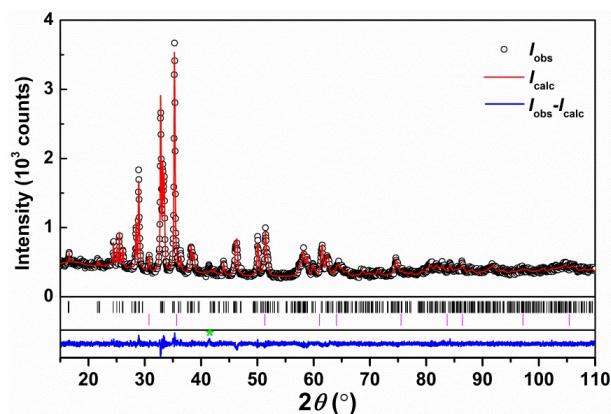

**Fig. S4** X-ray powder diffraction pattern for  $\text{Tb}_4\text{Co}_2\text{C}_3$  measured at 293(2) K and  $\lambda = 1.54185 \text{ \AA}$ . Black ticks indicate the positions of Bragg reflections for the  $\text{Tb}_4\text{Co}_2\text{C}_3$  phase, magenta ticks –  $\beta\text{-Tb}_2\text{C}$  (ST NaCl) impurity phase. The green asterisk points out an impurity peak corresponding to the (311) reflection of  $\text{TbCo}_2$  (ST  $\text{MgCu}_2$ ).

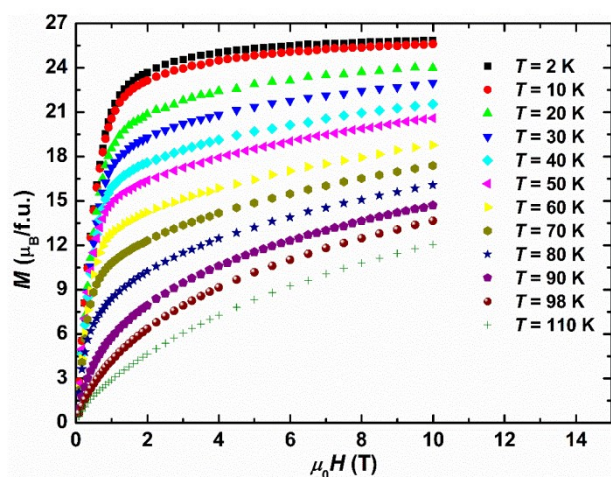

**Fig. S5** Isothermal magnetization curves of  $\text{Gd}_4\text{Co}_2\text{C}_3$ .

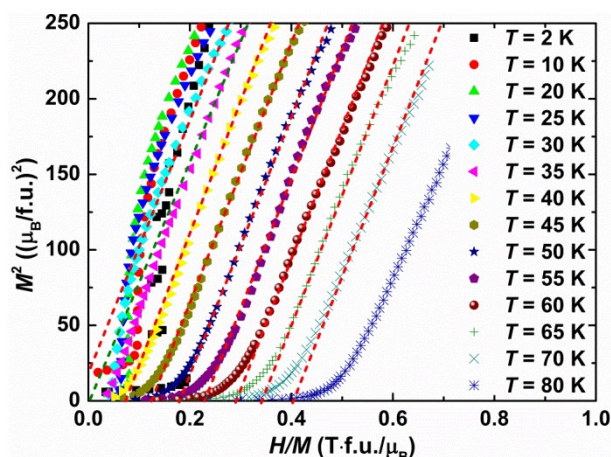

**Fig. S6** Arrott-Belov plots for  $\text{Tb}_4\text{Co}_2\text{C}_3$ . The dashed lines are linear extrapolations.
